# Supplementary material
Source: Copernicus journal article supplement (doi:10.5194/egusphere-2026-2524)
Supplement: Supplementary file 1 [file egusphere-2026-2524-supplement.pdf]

1 **Supplementary Material: Inferring on-glacier meteorology from physical**  
2 **modeling and remote sensing**

3 Shaoting Ren<sup>1</sup>, Evan S. Miles<sup>2,3,4</sup>, Michael McCarthy<sup>1,2</sup>, Achille Jouberton<sup>1</sup>, Thomas E. Shaw<sup>1</sup>, Pascal  
4 Buri<sup>6</sup>, Marin Kneib<sup>2,5</sup>, Prateek Gantayat<sup>1</sup>, Anneli Guthke<sup>7</sup> and Francesca Pellicciotti<sup>1</sup>

5 <sup>1</sup>Institute of Science and Technology Austria, ISTA, Klosterneuburg, Austria

6 <sup>2</sup>Swiss Federal Institute for Forest, Snow and Landscape Research (WSL), Birmensdorf & Sion,  
7 Switzerland

8 <sup>3</sup>Institute of Geography, University of Zurich, Zurich, Switzerland

9 <sup>4</sup>Department of Geosciences, University of Fribourg, Switzerland

10 <sup>5</sup>Institute of Environmental Engineering & Laboratory of Hydraulics, Hydrology and Glaciology, ETH  
11 Zurich, Zurich, Switzerland

12 <sup>6</sup>Geophysical Institute, University of Alaska Fairbanks, Fairbanks, USA

13 <sup>7</sup>Stuttgart Center for Simulation Science, University of Stuttgart, Stuttgart, Germany

14

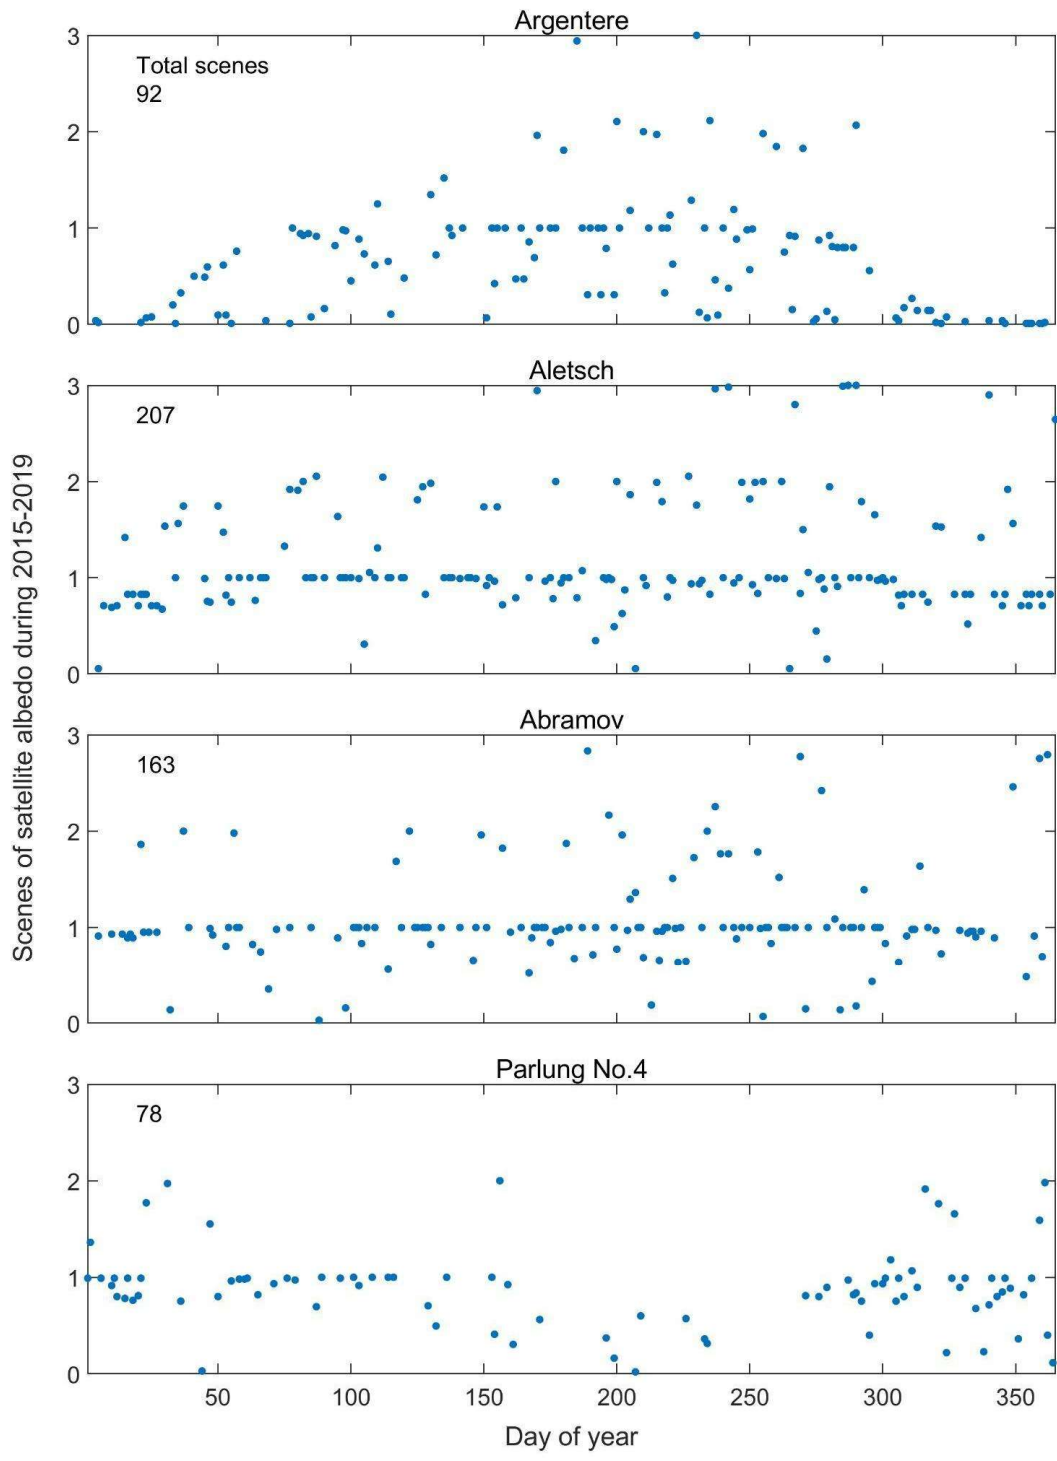

15  
16  
17  
18  
19

**Figure S1.** Total number of scenes of Landsat-8 and Sentinel-2 satellites during 2015-2019. Note that the scene is calculated by the area percent of the clear region when the glacier is partially covered by cloud and mountain shadow.

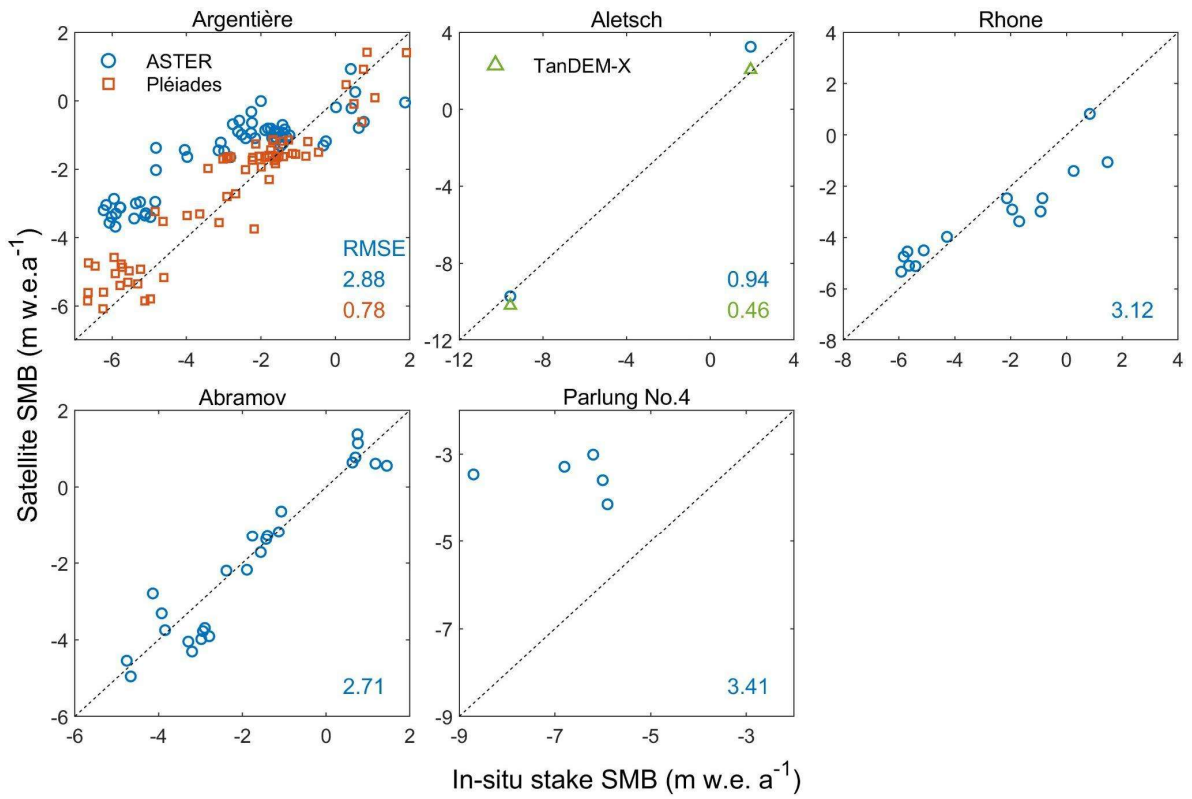

20  
 21 **Figure S2.** Satellite against in-situ stake SMB measurements across five glaciers. Note that this is not a “real”  
 22 evaluation since some stake SMB do not cover the whole period of satellite SMB due to data absence.  
 23

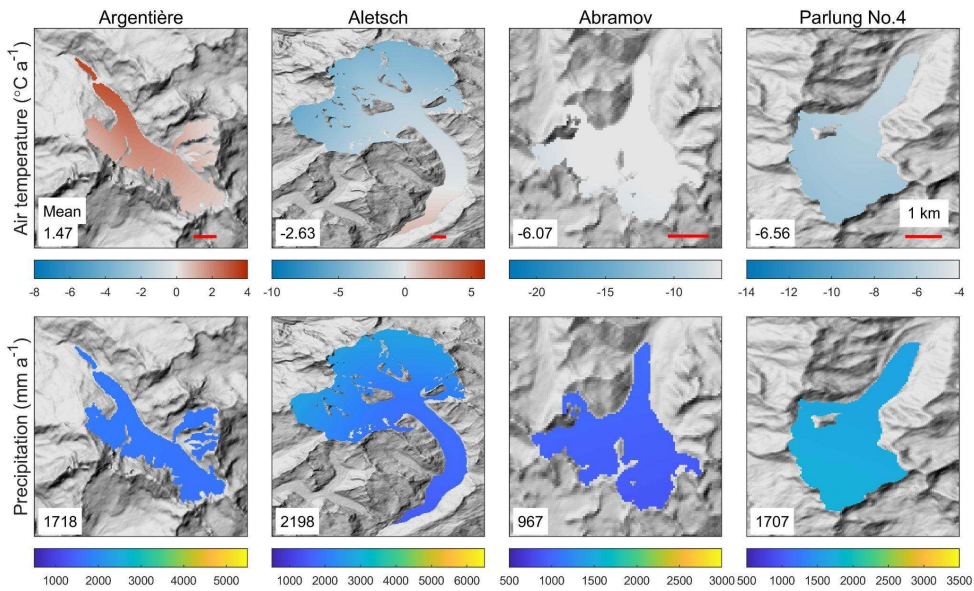

24  
 25 **Figure S3.** Multi-year average air temperature and precipitation from statistically downscaled ERA5-Land  
 26 reanalysis data over 2015-2019. The number in each panel is glacier-wide average. The colorbar is the same as  
 27 Fig. S6 for comparison.  
 28

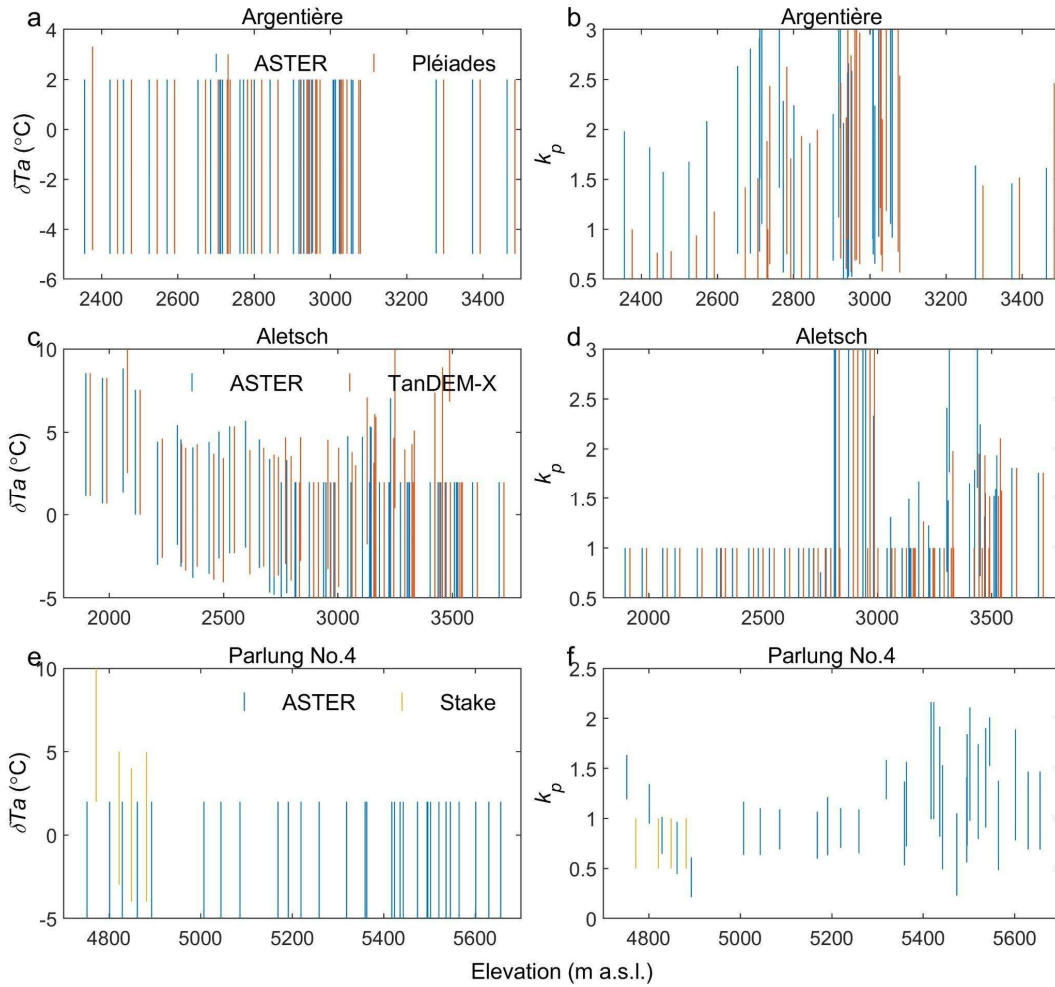

29  
 30 **Figure S4.** Prior range determined by ASTER against other SMB datasets across the three glaciers. a-b, ASTER  
 31 against Pléiades SMB for Argentière Glacier; c-d, ASTER against TanDEM-X SMB for Aletsch Glacier; e-f,  
 32 ASTER against Stake SMB for Parlung No.4 Glacier. The first column is for air temperature prior ( $\Delta Ta$ , °C)  
 33 and the second column is for precipitation correction factor ( $k_p$ ).  
 34

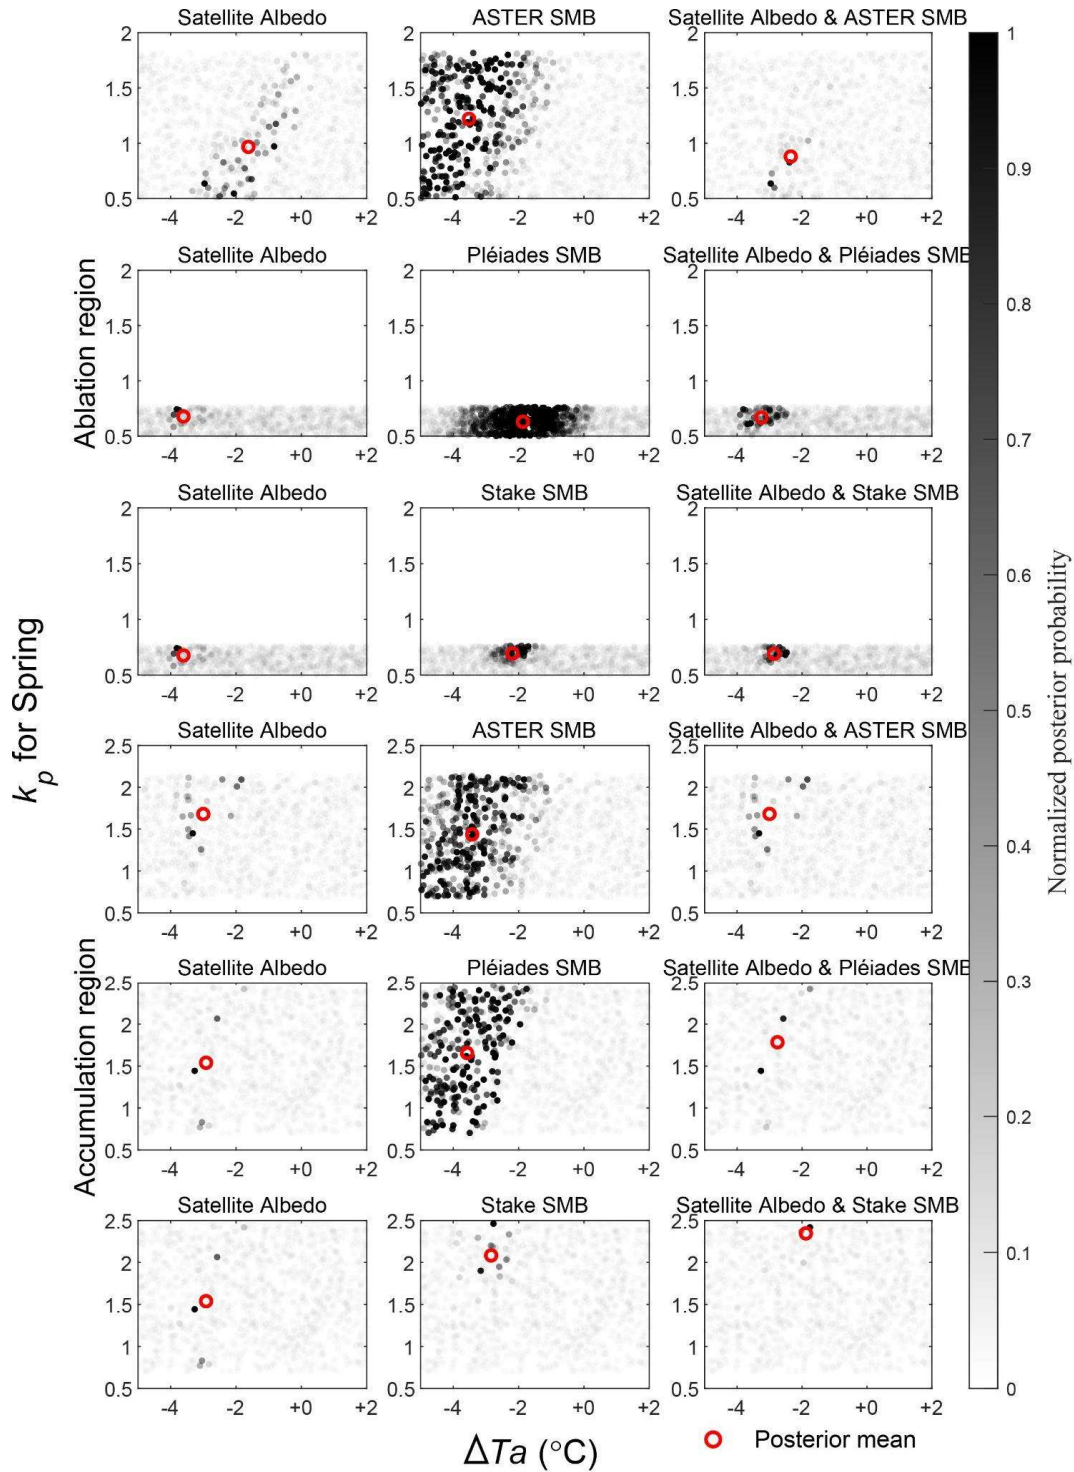

35  
 36 **Figure S5.** Two examples of Monte Carlo posterior samples (intensity-coded by their normalized posterior  
 37 probability) distributions and inferred (posterior mean) bias-correctors for nine different combinations of targets  
 38 at two stake SMB measurements at the ablation and accumulation region of Argentière Glacier (marked  $P_{Ar\_abl}$   
 39 and  $P_{Ar\_acc}$  in Fig. 1c, same as Fig. 4). Black points are 1000 Monte Carlo simulations. Note that the period of  
 40 ASTER SMB is 2015-2019, while Pléiades SMB is 2013-2022. Correction spaces are narrow when using  
 41 Pléiades/Stake SMB as a target due to narrow prior of  $k_p$  (Fig. S4b).  
 42

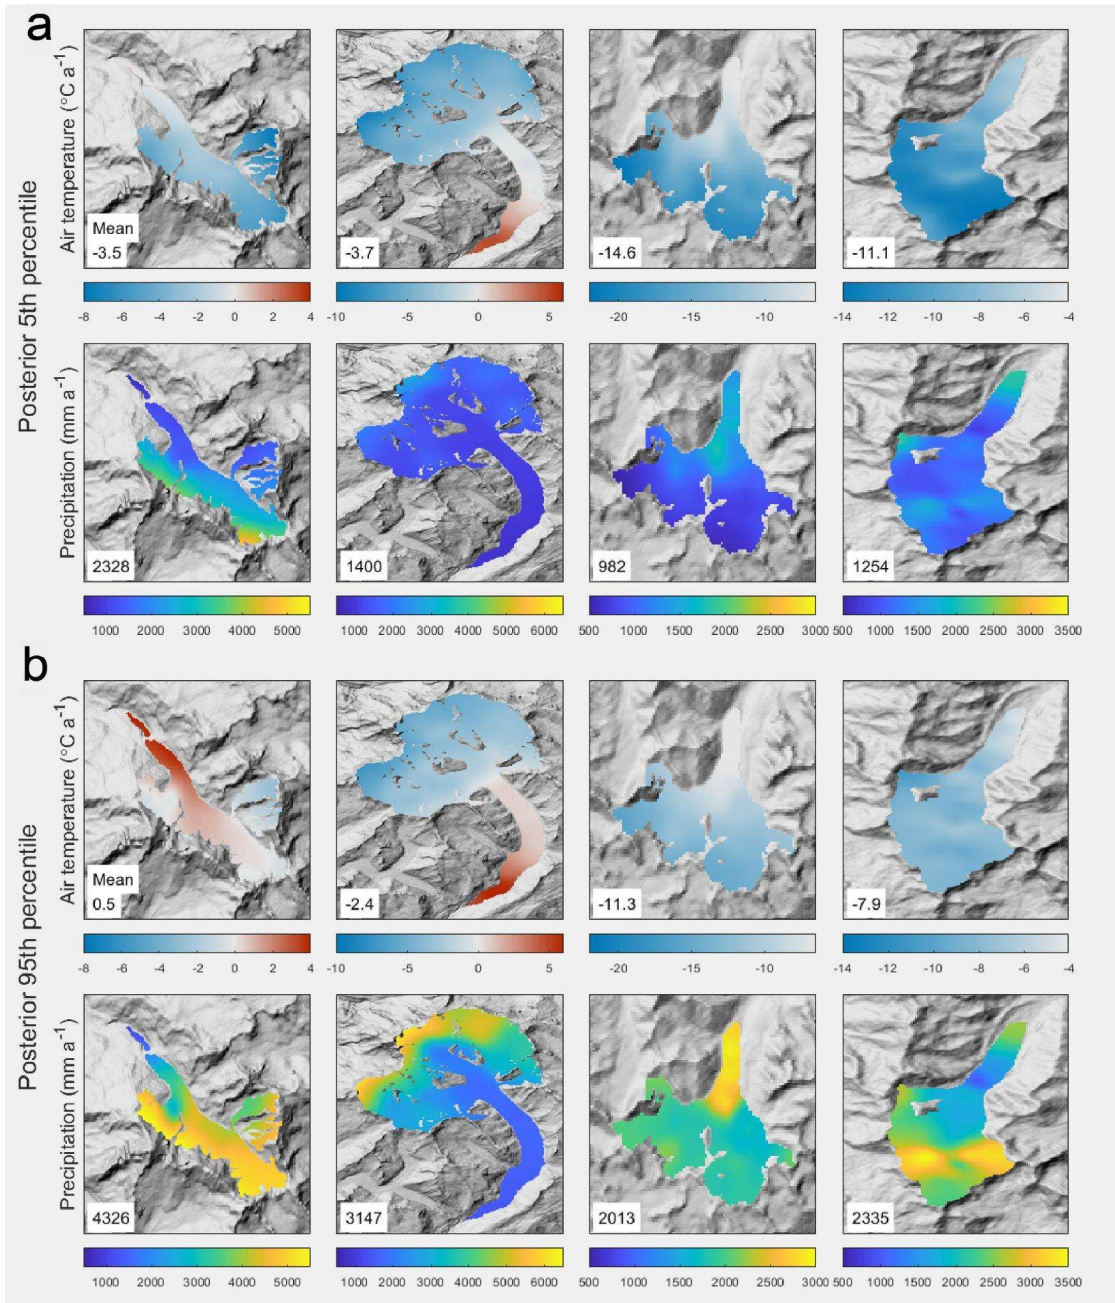

43  
 44 **Figure S6.** Inferred uncertainties of multi-year average air temperature and precipitation with 5th (a) and 95th  
 45 (b) posterior percentile by ASTER SMB and satellite albedos during 2015-2019. The number in each panel is  
 46 glacier-wide average.  
 47

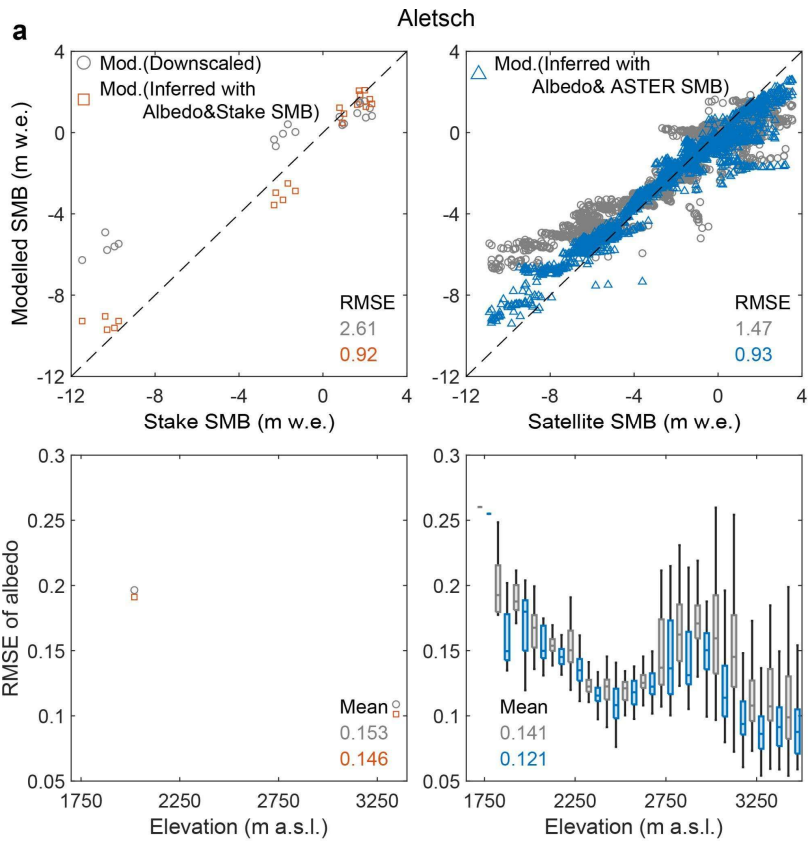

48

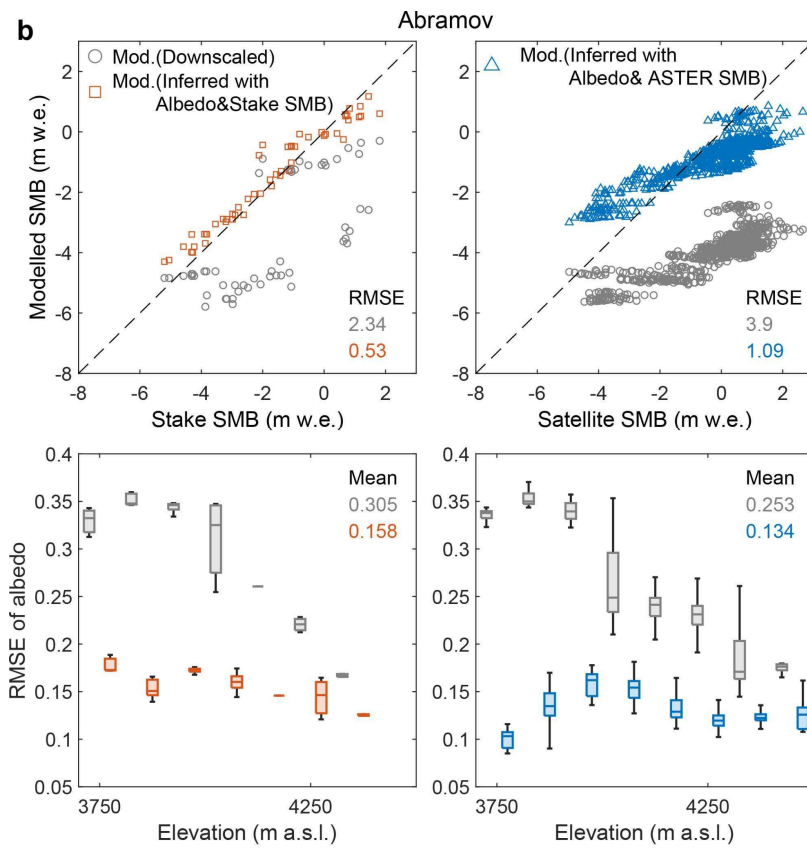

49

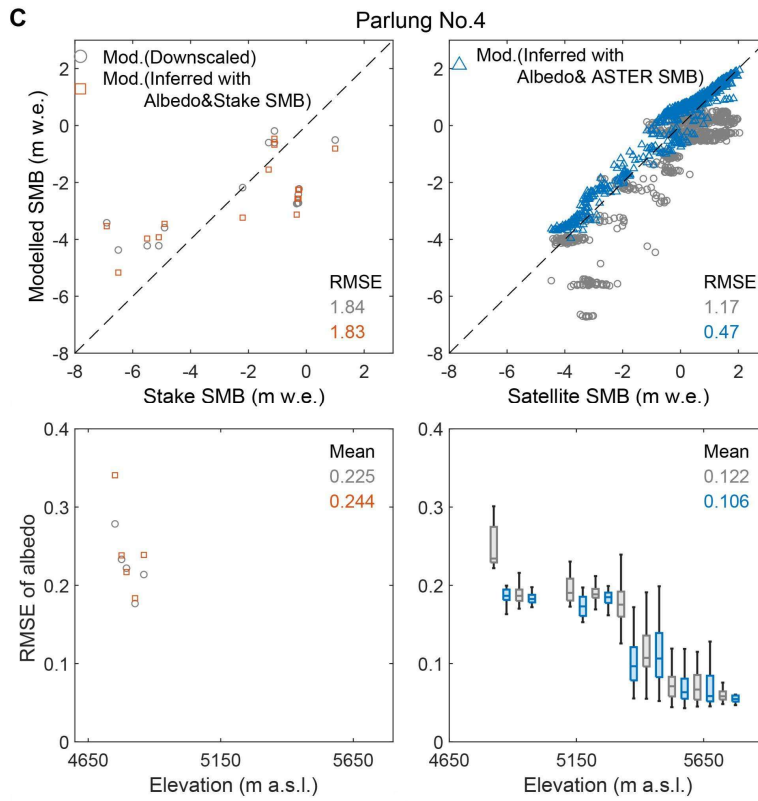

50  
 51 **Figure S7.** modelled SMB (first row of each panel) and glacier albedo (second row of each panel) against used  
 52 targets at Aletsch (a), Abramov (b) and Parlung No.4 (c) Glacier (same as Fig. 5 but for other glaciers). Grey  
 53 represents modelled with downscaling ERA5-Land, red is inferred with satellite albedo and stake SMB, and  
 54 blue is inferred with satellite albedo and SMB. Note that the points in the first subpanel represent all  
 55 measurements from stakes, while in the second subpanel they represent all locations used for inference (black  
 56 points in Fig. 7b-d).  
 57

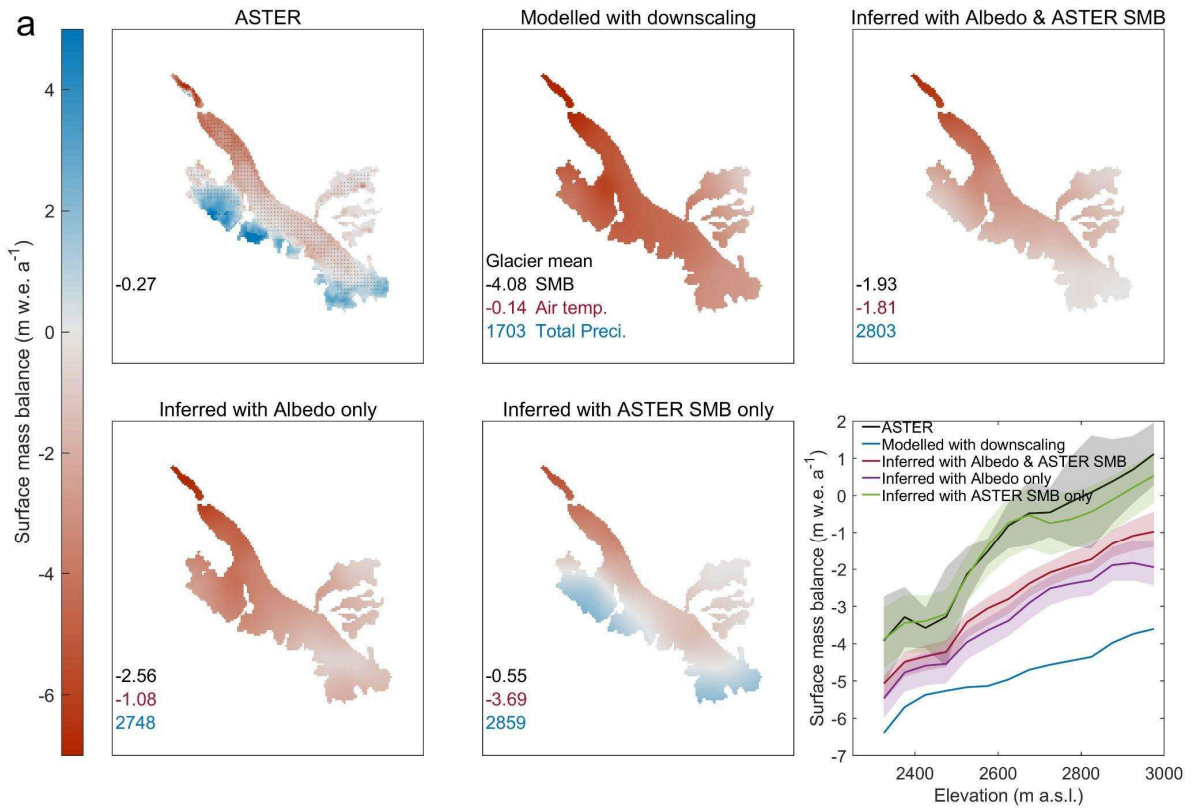

58

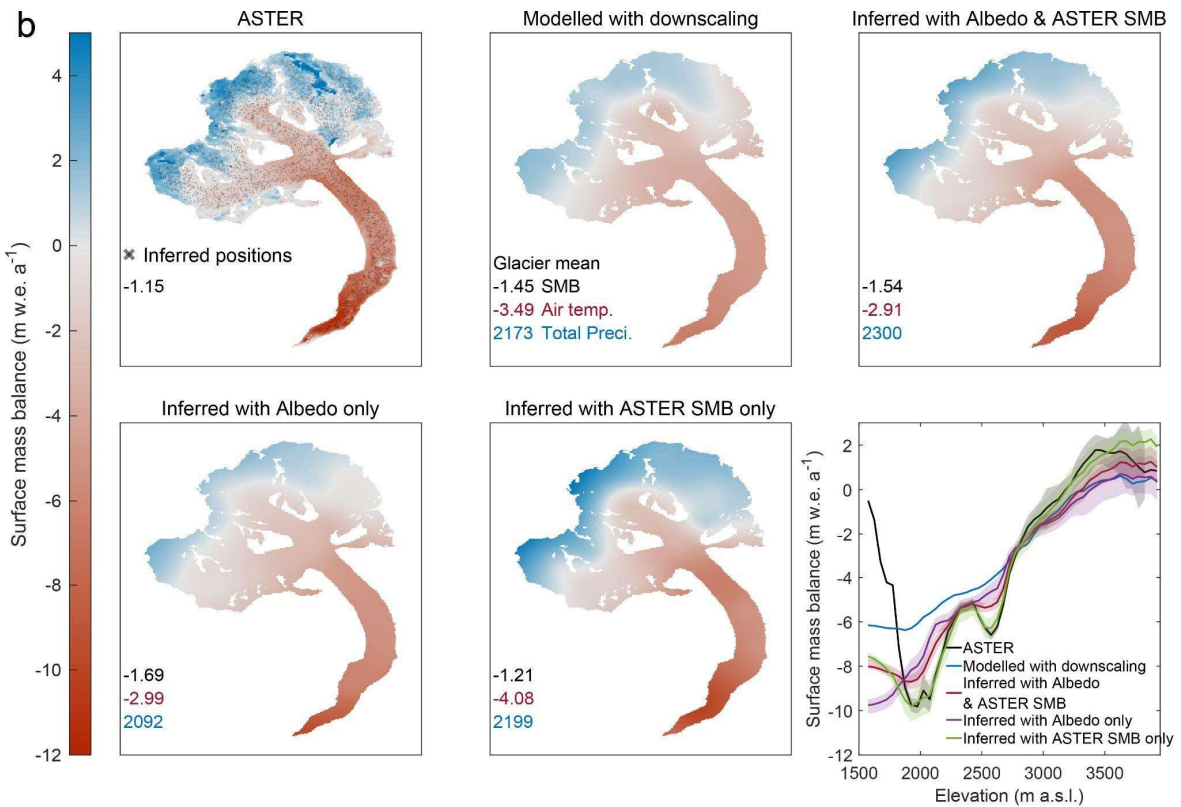

59

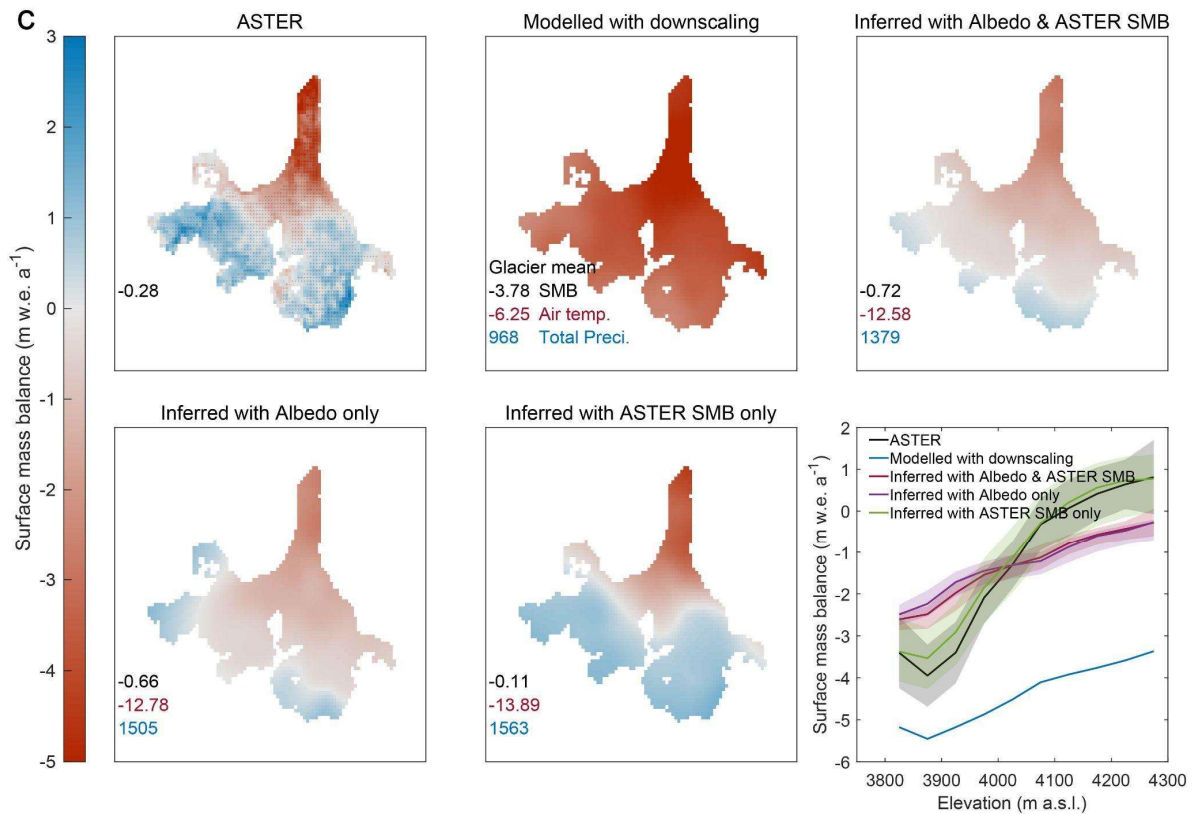

60

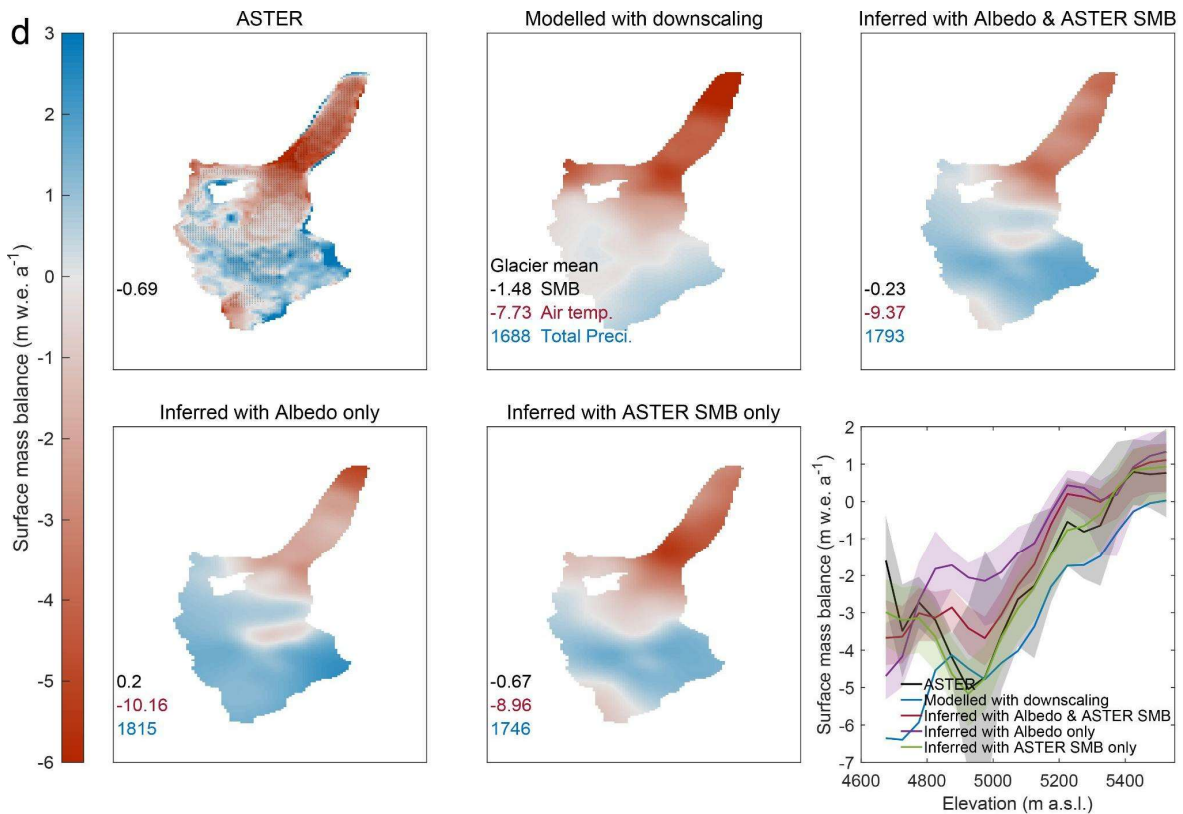

61

62 **Figure S8.** Comparison of modelled and ASTER SMB at Argentière (a), Aletsch (b), Abramov (c) and Parlung  
 63 No.4 (d) Glaciers. Black points in the first subpanel are inferred locations. Black numbers are glacier-wide mean  
 64 SMB, red and blue numbers are glacier-wide mean air temperature and precipitation used for SMB map  
 65 generation. The shading area in the last panel is the uncertainty of SMB in each 50 m elevation bin.

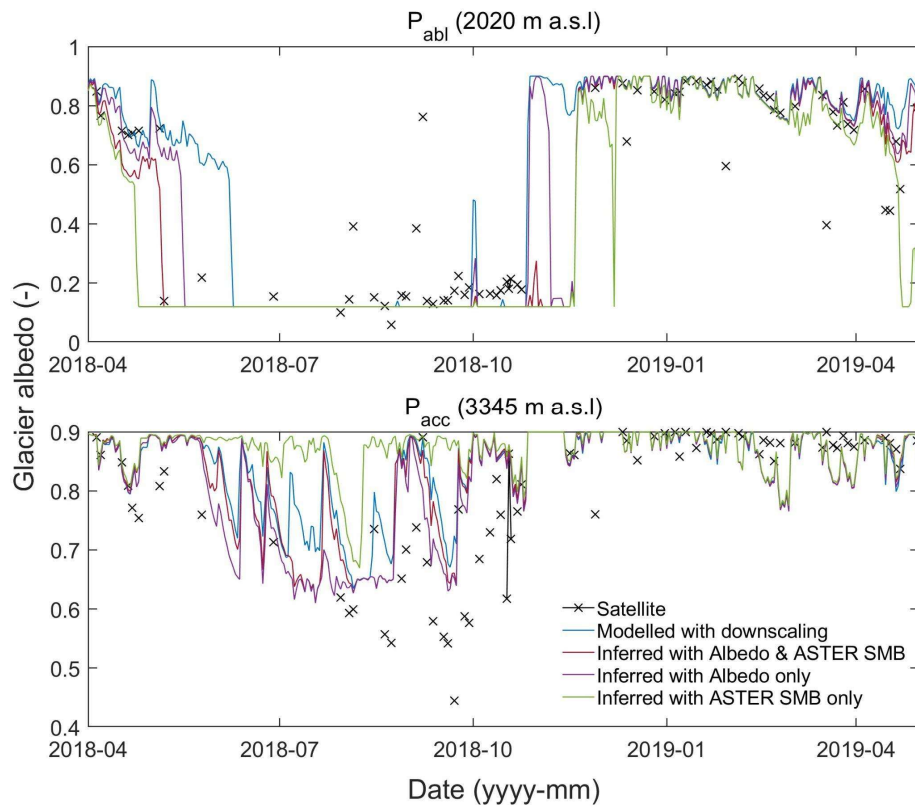

67

68 **Figure S9.** Two examples of temporal dynamics of glacier albedo derived from inference with satellite albedo  
 69 & ASTER SMB against satellite observations at two stake SMB measurements at the ablation and accumulation  
 70 region of Aletsch Glacier (marked  $P_{abl\_Al}$  and  $P_{acc\_Al}$  in Fig. 1d) during 2018-2019.

71

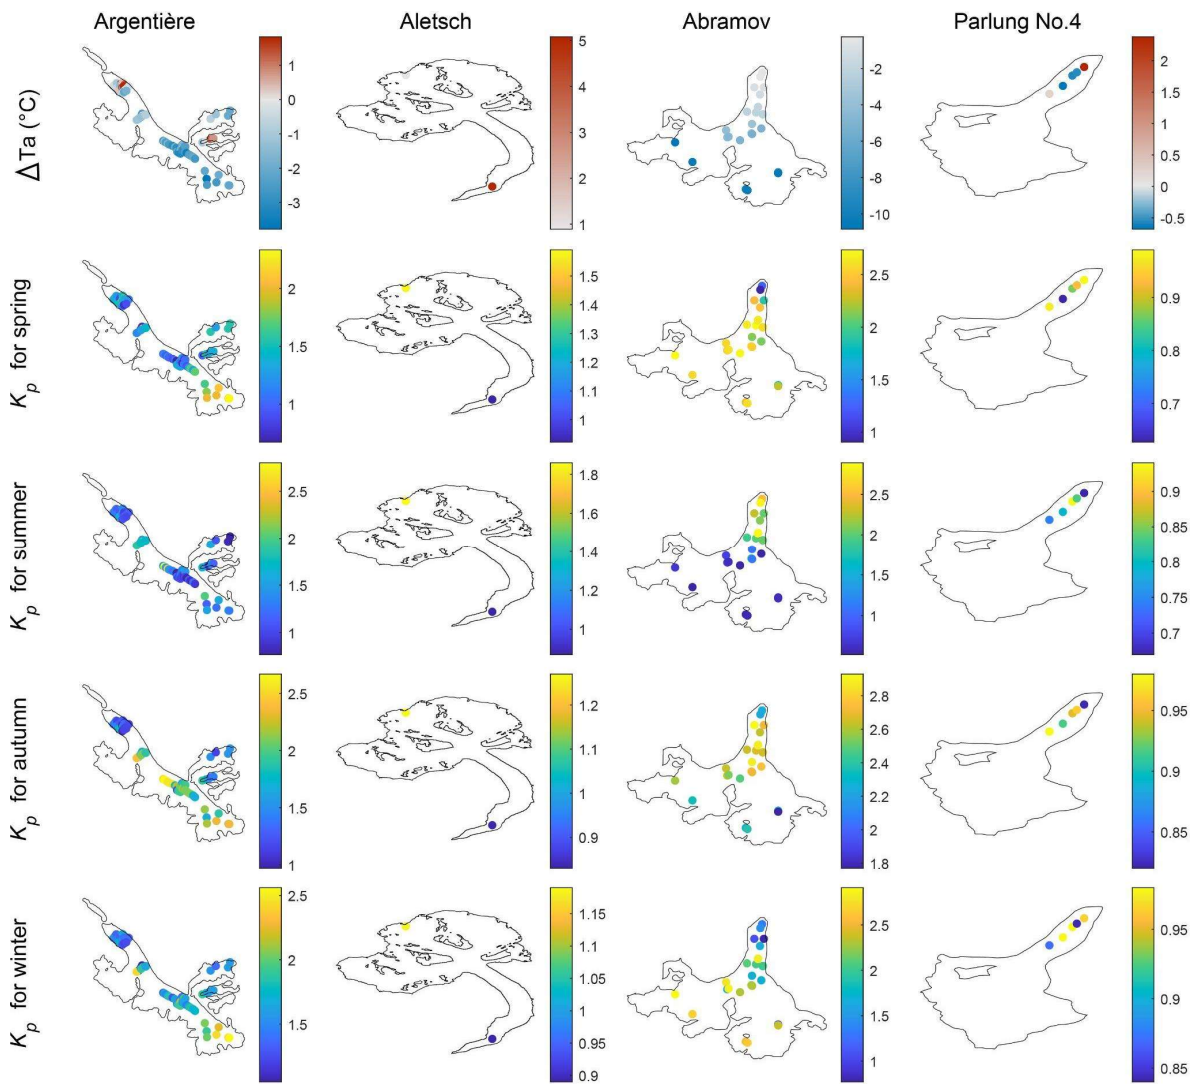

72  
 73 **Figure S10.** Inferred additive factor for air temperature ( $\Delta T_a$ , first row) and multiplicative factor for seasonal  
 74 precipitation ( $k_p$ , second-fifth rows) with satellite albedo and stake SMB at the locations of stakes for four  
 75 tested glaciers over 2015-2019. The points in each panel are the locations of stake SMB measurements and their  
 76 colors indicate correction factors. Note that these factors are relative to their nearest downscaled meteorology  
 77 (purple points in Fig. 1c-f)

78

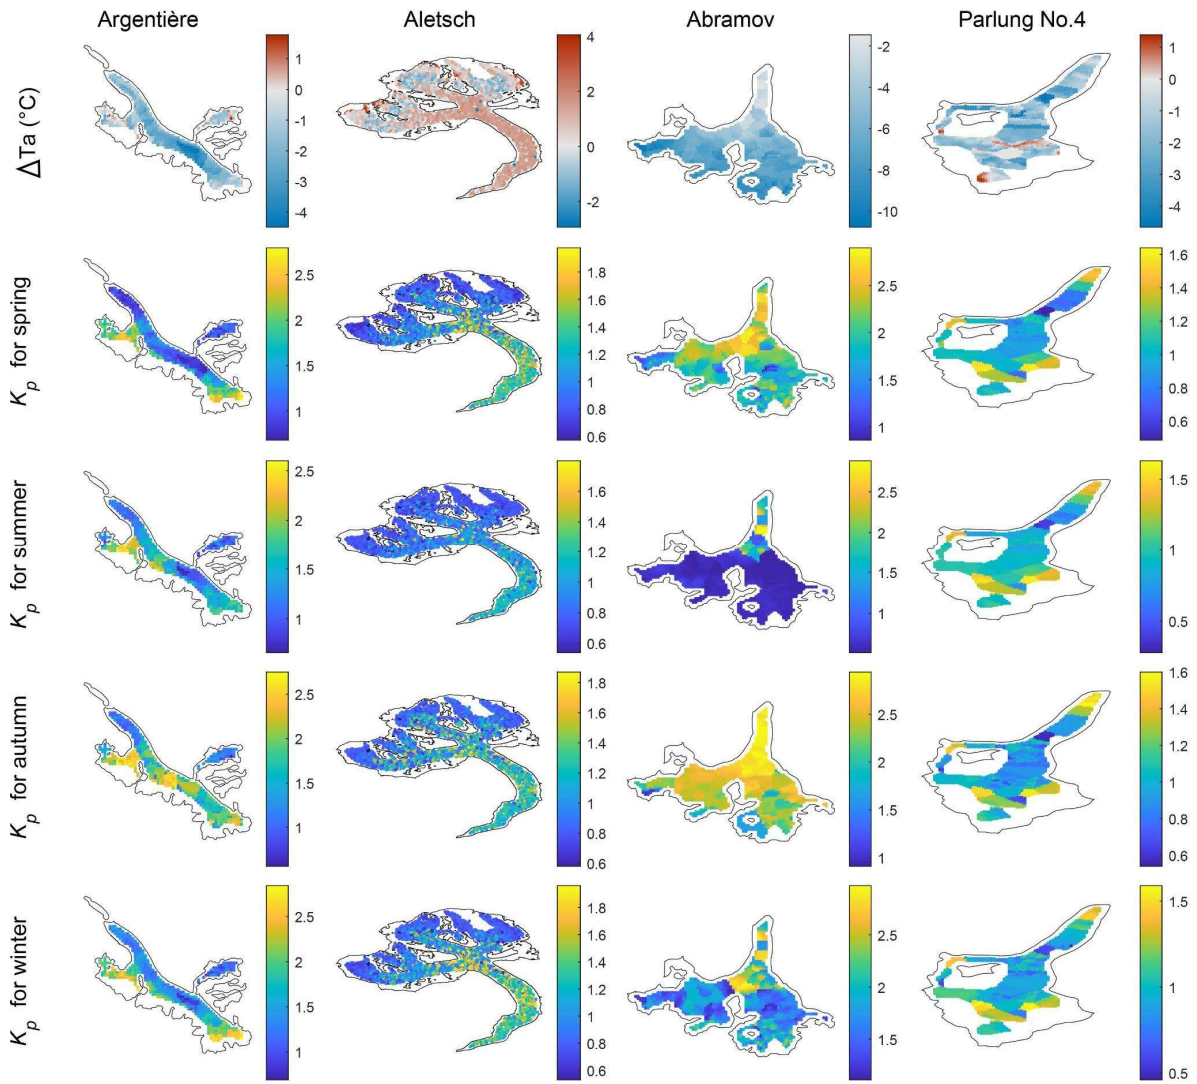

79

80

81

**Figure S11.** Same as Fig. 8 but for inference with satellite albedo and ASTER SMB.

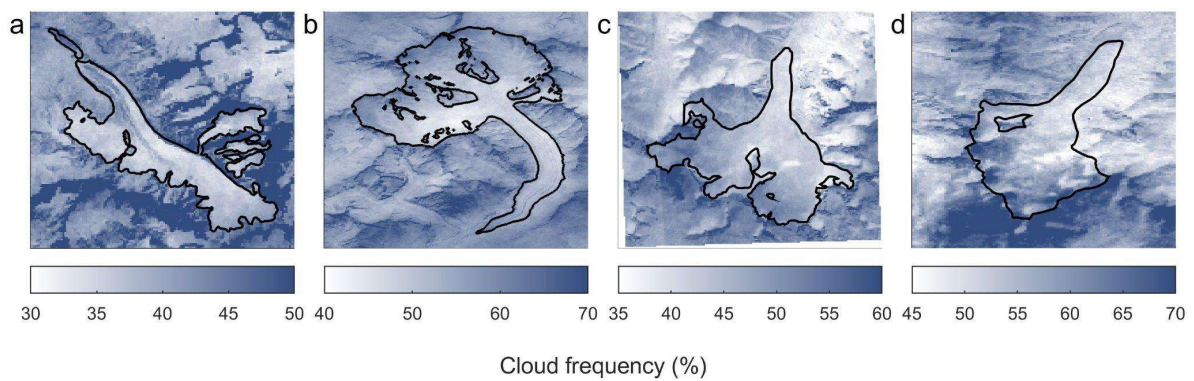

82

83

84

**Figure S12.** Cloud frequency maps derived with Sentinel-2 over the four glaciers for 2015–2019.

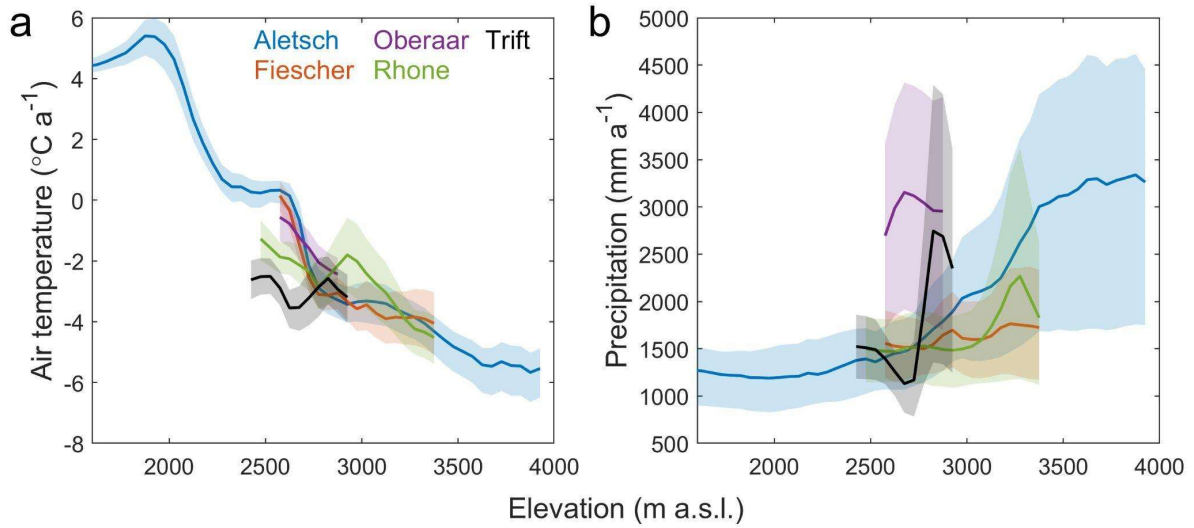

85  
 86 **Figure S13.** Inferred multi-year average meteorology by satellite albedo and ASTER SMB datasets as a  
 87 function of elevation at the five glaciers of Upper Valais. The shaded area represents the uncertainty within  
 88 each elevation bin. The dataset used for aggregation is the same as in Fig. 9.  
 89

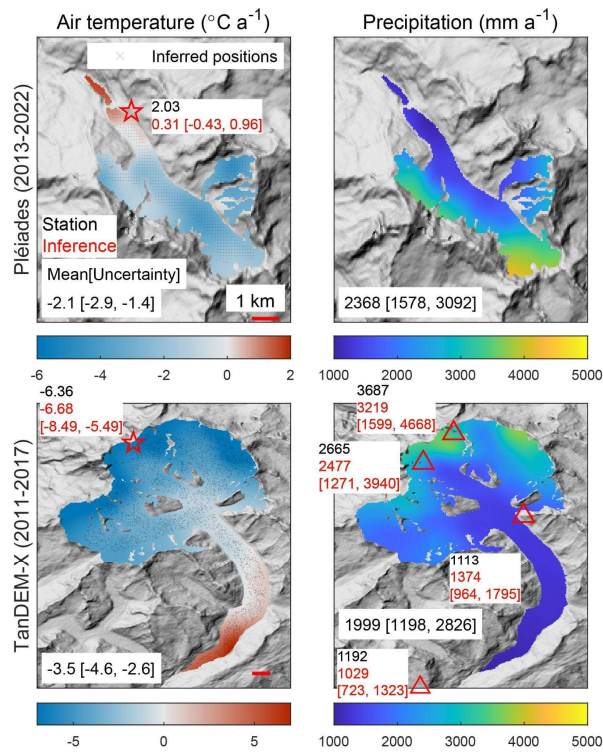

90  
 91 **Figure S14.** Same as Fig. 6 but inferred by satellite albedo and high-quality SMB datasets (Pléiades/  
 92 TanDEM-X). The colorbar is the same as Fig. 6.  
 93

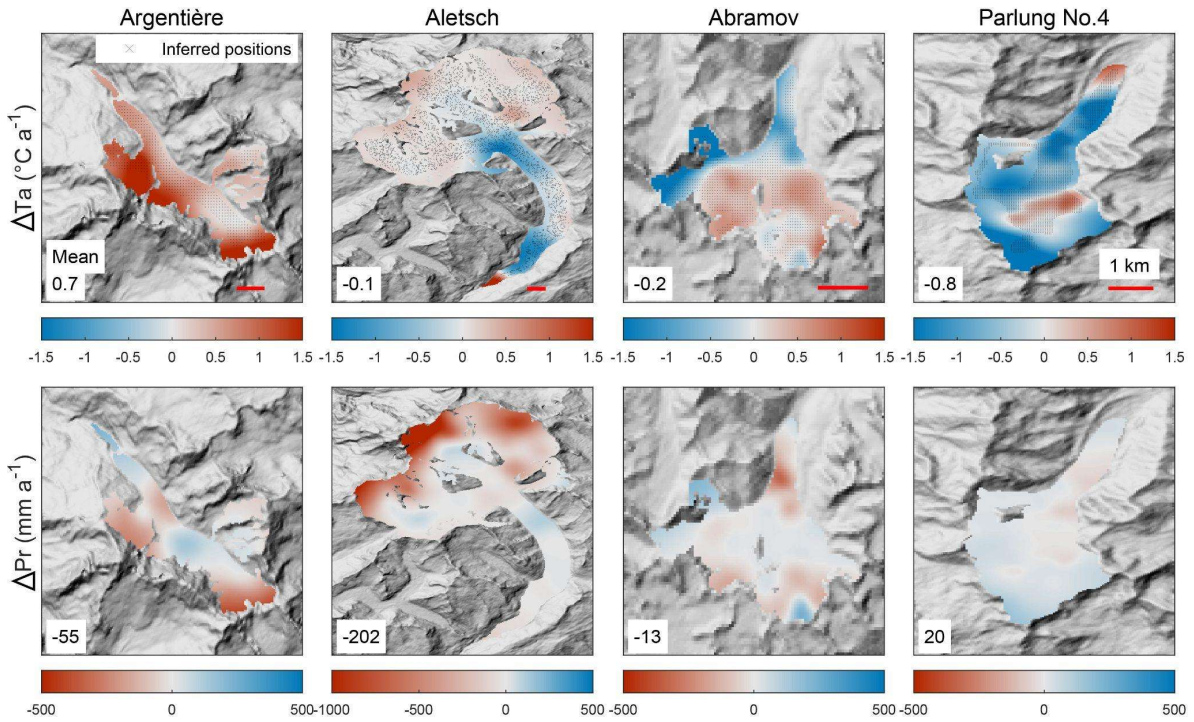

94  
 95 **Figure S15.** Difference of inferred multi-year average air temperature (a) and precipitation (b) between using  
 96 satellite albedo only and using satellite albedo and ASTER SMB across four glaciers over 2015-2019. A:  
 97  $Ta_{\text{Albedo}} - Ta_{\text{Albedo\&ASTER SMB}}$ ;  $Pr_{\text{Albedo}} - Pr_{\text{Albedo\&ASTER SMB}}$ . The displayed numbers in the left corner represent the  
 98 glacier-wide mean values.

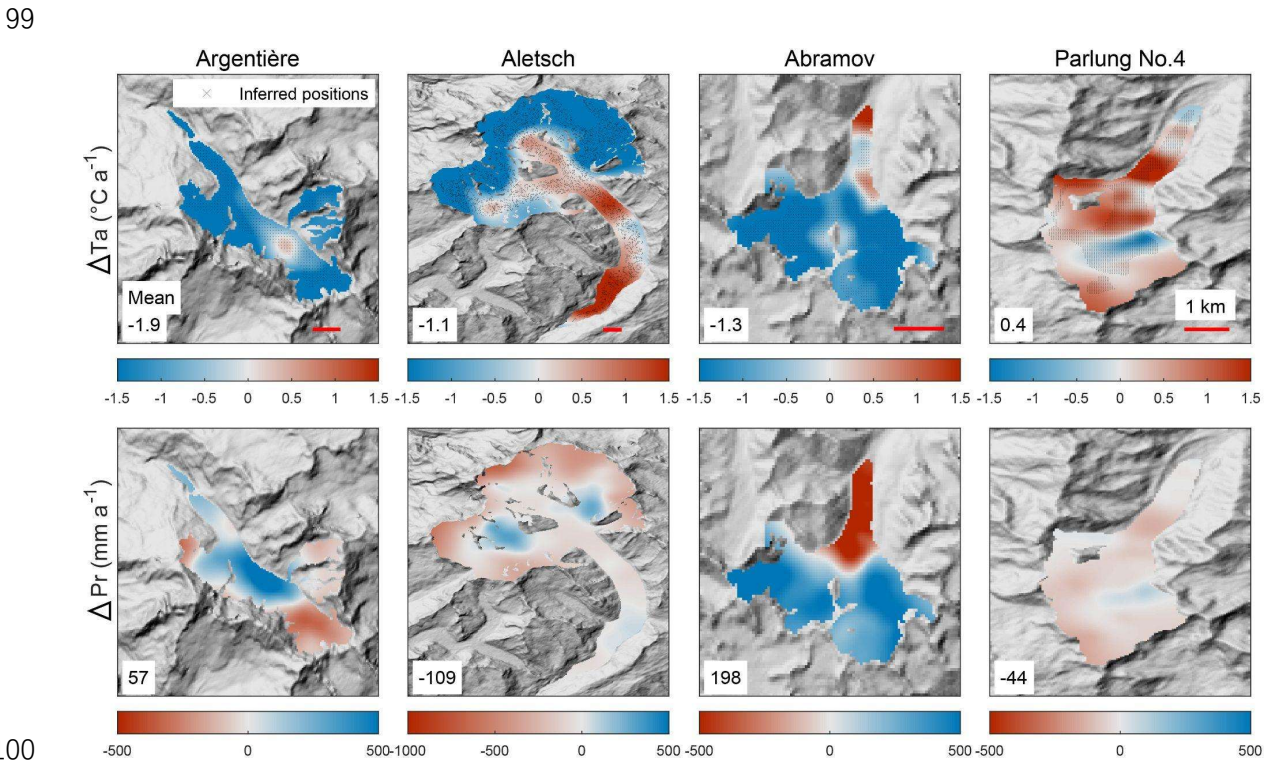

100  
 101 **Figure S16.** Same to Fig. S15 but for the difference between using ASTER SMB only and using satellite albedo  
 102 and ASTER SMB.

105 **Table S1.** Datasets used in this study

| Type                                    | Parameter                                      | Glacier    | Period                                | Note                                                                 | Reference                      |
|-----------------------------------------|------------------------------------------------|------------|---------------------------------------|----------------------------------------------------------------------|--------------------------------|
| <b>Forcing data<br/>(Meteorology)</b>   | ERA5-Land<br>(Seven variables)                 | All        | 2014-2019,<br>2011-2022               |                                                                      | Muñoz-Sabater,<br>2021         |
| <b>Target data<br/>(Remote sensing)</b> | Glacier albedo<br>(Landsat-8/9,<br>Sentinel-2) | All        | 2014-2019,<br>2011-2022               |                                                                      | Ren et al. (2021)              |
|                                         | Low-quantity<br>SMB (ASTER)                    | All        | 2015-2019                             |                                                                      | Miles et al. (2021)            |
|                                         | High-quantity<br>SMB (Pléiades)                | Argentière | 2013-2022,<br>2013-2018,<br>2019-2022 | Comparison with<br>ASTER inference                                   | Kneib et al. (2024)            |
|                                         | High-quantity<br>SMB (TanDEM-<br>X)            | Aletsch    | 2011-2017                             | Comparison with<br>ASTER inference                                   | Leinss et al.<br>(2021)        |
| <b>Evaluation data</b>                  | In-situ<br>meteorology (Ta)                    | All        | 2014-2019,<br>2011-2022               | Three off-glacier and<br>one on-glacier<br>station (Parlung<br>No.4) | GLACIOCLIM ,<br>MeteoSwiss,    |
|                                         | In-situ<br>meteorology (Pr)                    | Aletsch    | 2011-2019                             | Five stations                                                        | MeteoSwiss ,                   |
|                                         | In-situ SMB                                    | Argentière | 2013-2022                             |                                                                      | GLACIOCLIM,<br>GLAMOS,WGM<br>S |
|                                         |                                                | Aletsch    | 2011-2019                             |                                                                      |                                |
|                                         |                                                | Abramov    | 2015-2019                             |                                                                      |                                |
|                                         | Cloud frequency<br>(Sentinel-2)                | All        | 2017-2019                             | Qualitative check                                                    |                                |

106

107

108
